# Supplementary material for: Comparative Analysis of Transposable Elements in Strawberry Genomes of Different Ploidy Levels
Source: MDPI journal article supplement (doi:10.3390/ijms242316935), 2023-11-29
Supplement: s1 [file Supplementary Figure S1-S3.docx]

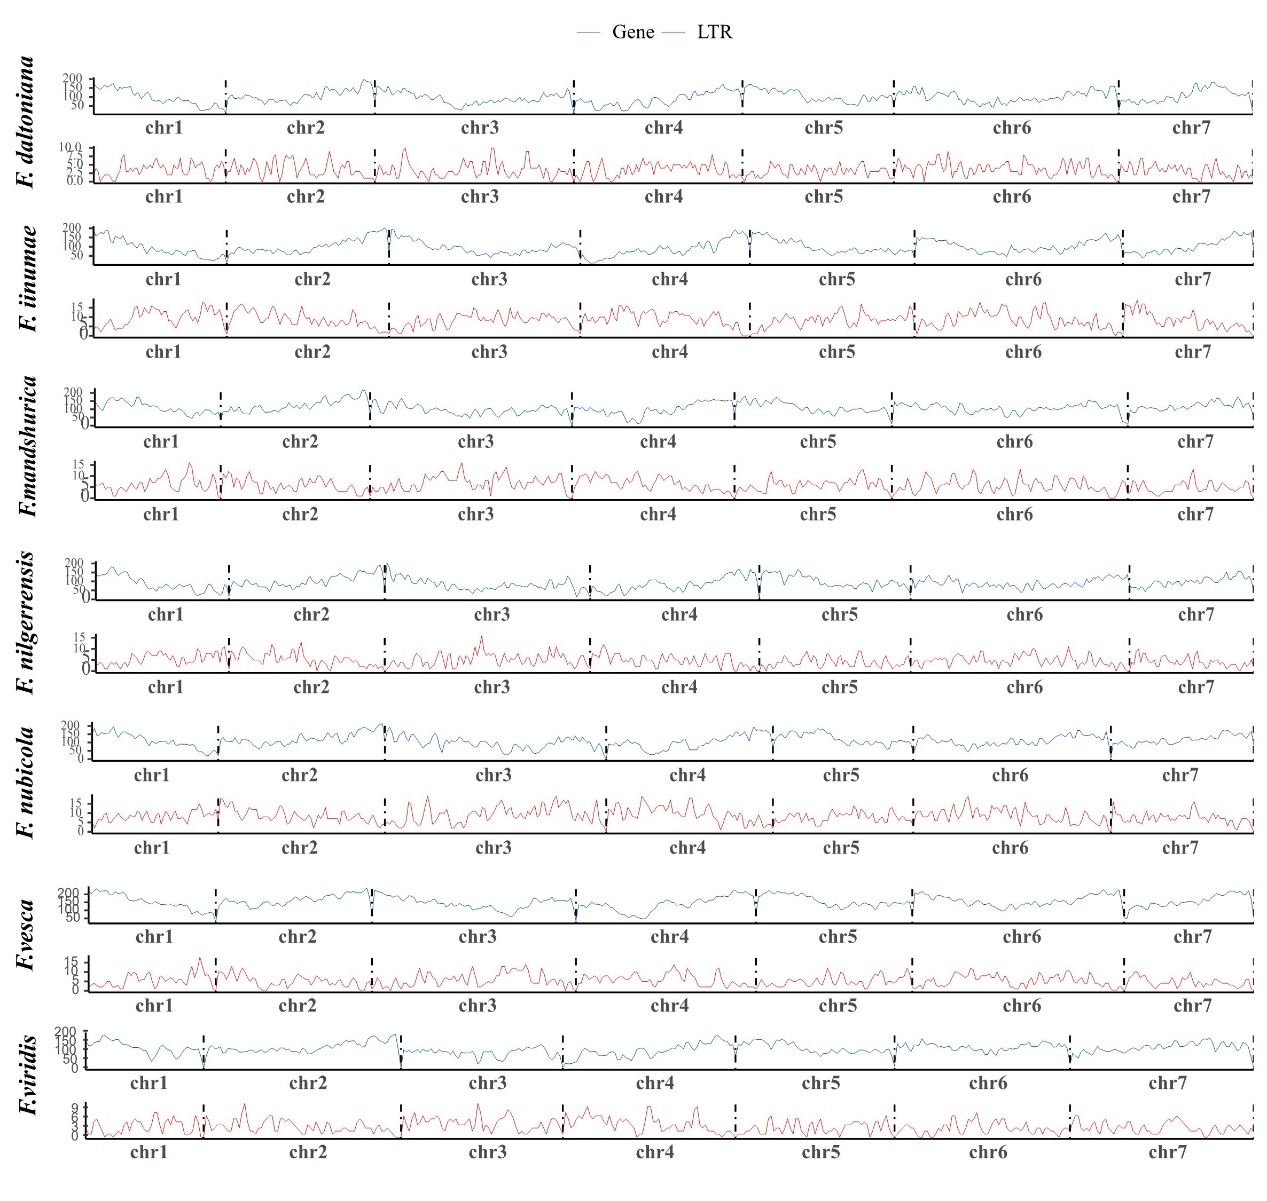


**Figure S1.** Distribution of genes and LTR-RTs on the pseudochromosomes of diploid strawberry species. Blue line is the distribution of genes, red line is the distribution of LTR-RTs.


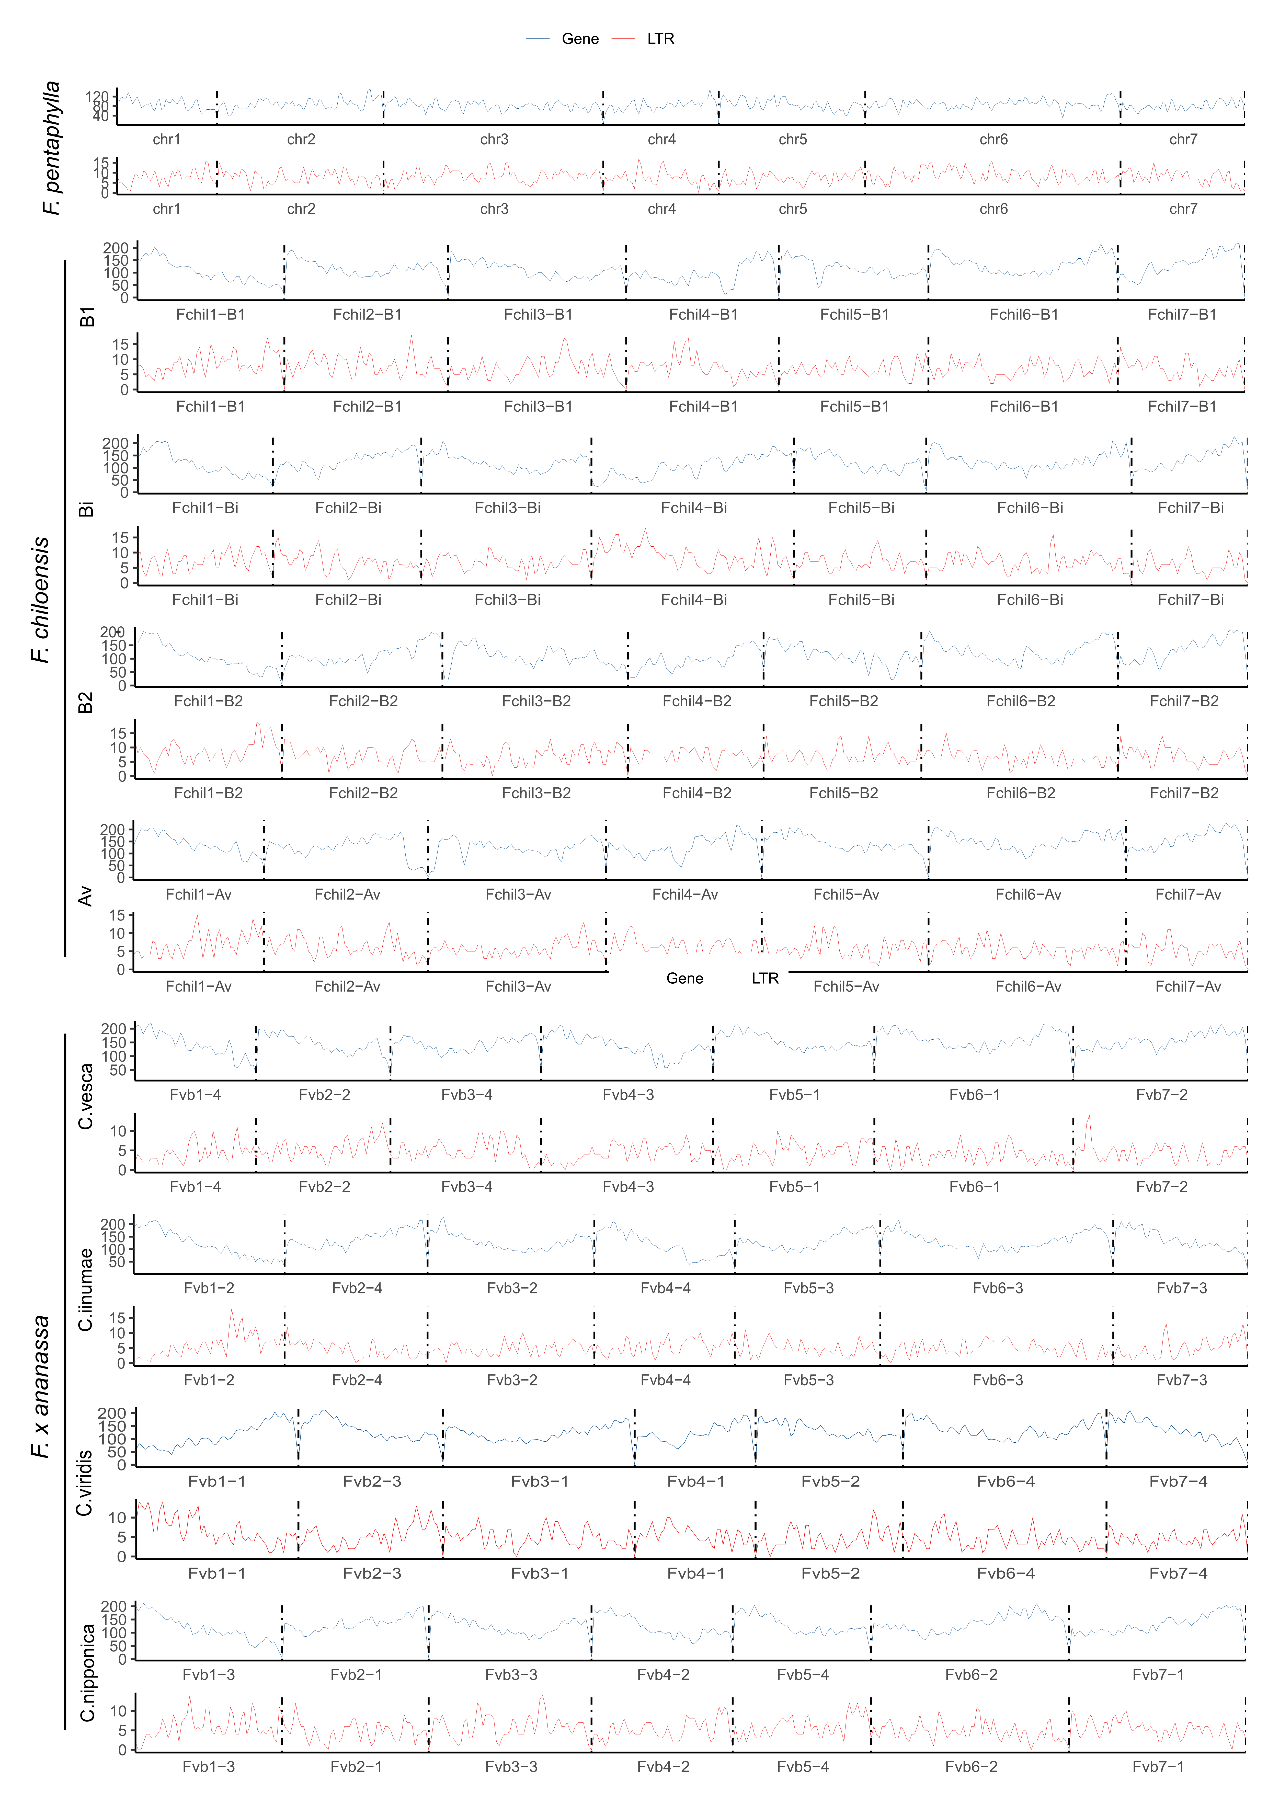


**Figure S2.** Distribution of genes and LTRs on the pseudochromosomes of polyploid strawberry species. Blue line is the distribution of genes, red line is the distribution of LTR-RTs.


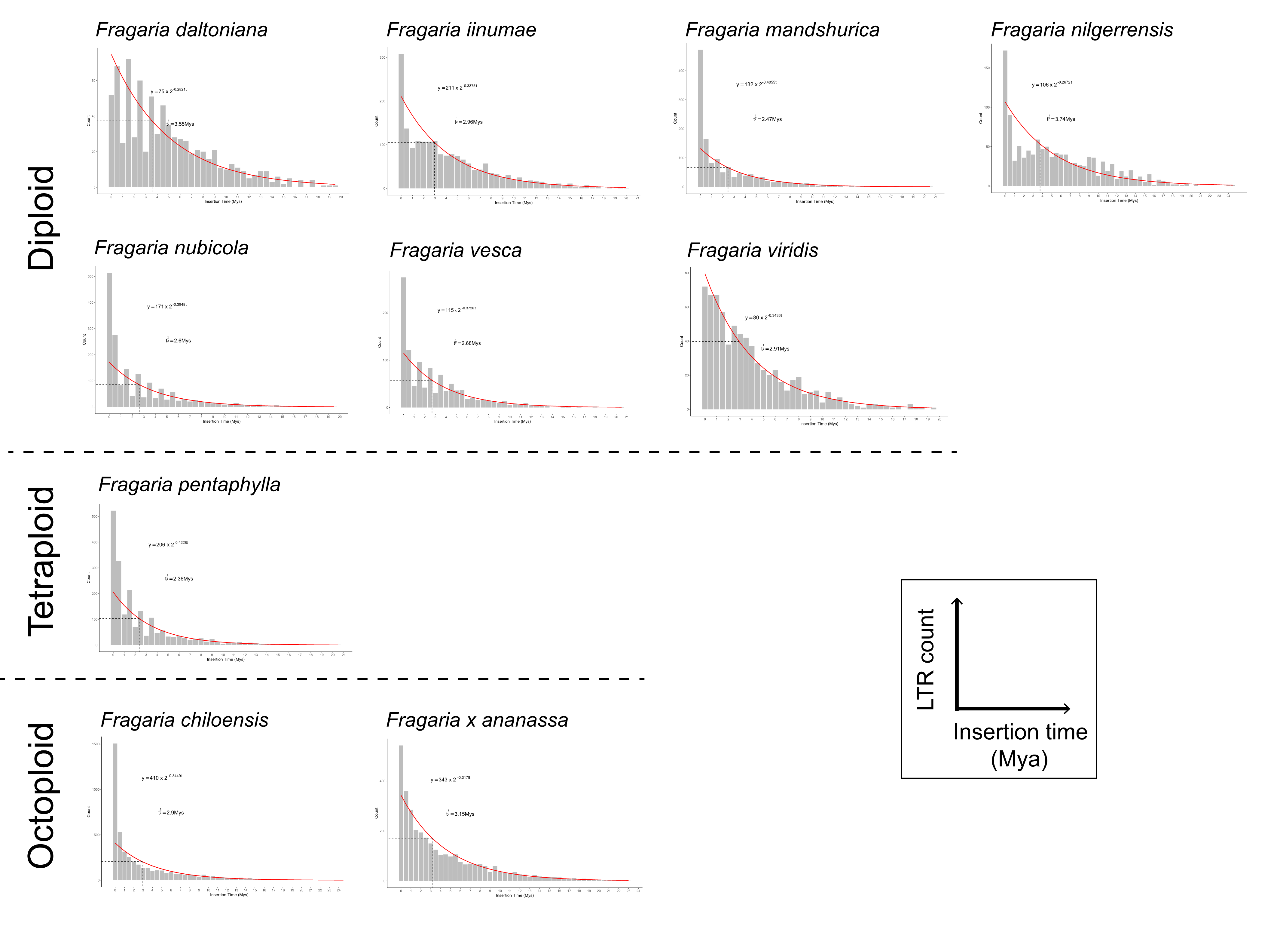


**Figure S3.** Distribution of LTR-RTs insertion times. Estimated insertion times were divided into bins of 500,000 years.
