# Supplementary material for: Comparative Analysis of Transposable Elements in Strawberry Genomes of Different Ploidy Levels
Source: MDPI journal article supplement (doi:10.3390/ijms242316935), 2023-11-29
Supplement: s1 [file Supplementary Table S1-S6.xlsx]

## Sheet: Table S1
Supplementary Table S1. Number of TEs annotated in each strawberry genome
TE		Diploid							Tetraploid	Octoploid
		F. daltoniana	F. mandschurica	F. nilgerrensis	F. nubicola	F. iinumae	F. vesca	F. viridis	F. pentaphylla	F. chiloensis	F. x ananassa
Class I		1011	1050	1066	1302	1340	897	855	1391	2917	2701
LTR		982	1022	1025	1273	1314	869	824	1361	2889	2660
	Copyia	403	422	399	480	403	413	377	525	817	838
	Gypsy	142	279	294	295	432	205	239	309	906	785
	unknown	437	321	332	498	479	251	208	527	1166	1037
nonLTR
	LINE	29	28	41	29	26	28	31	27	28	41
	DIRS	0	0	0	0	0	0	0	3	0	0
Class II		2138	2077	1923	2094	1328	1875	1743	2202	4186	4181
Subclass I
TIR		1918	1854	1706	1850	1154	1653	1541	1947	3730	3730
	CACTA	403	464	492	421	286	389	445	470	975	923
	Mutator	842	691	697	775	451	635	578	764	1325	1393
	PIF–Harbinger	197	210	130	190	112	182	160	213	380	415
	Tc1-Mariner	14	26	11	12	10	23	16	14	44	41
	hAT	462	463	376	452	295	424	342	486	1006	958
Subclass II
	Helitron	220	223	217	244	174	222	202	255	456	451
unknown		573	393	486	414	448	384	493	454	898	828
Total		3722	3520	3475	3810	3116	3156	3091	4047	8001	7710

## Sheet: Table S2
Supplementary Table S2. Summary of the percentage of TEs in ten genomes of Fragaria species
Genome		Diploid							Tetraploid	Octoploid
		F. mandshurica	F. nubicola	F. daltoniana	F. nilgerrensis	F. viridis	F. vesca	F. iinumae	F. pentaphylla	F. chiloensis	F. x ananassa
Class I		21.0952	22.5389	24.1591	25.4741	21.2477	21.1621	34.9419	22.9747	28.1417	27.3469
LTR		20.2107	21.6638	23.1953	24.6247	20.1599	20.2786	34.1943	22.1248	27.456	26.639
	Copyia	5.65526	6.86408	7.41137	7.24519	6.1702	5.67486	7.43171	7.34257	6.80847	6.57523
	Gypsy	12.753	12.3726	14.4125	16.2319	13.0685	13.1226	25.1141	12.6855	19.1283	18.9036
nonLTR		0.884515	0.875015	0.963761	0.849363	1.08783	0.883494	0.747597	0.849905	0.685675	0.707913
	LINE	0.767674	0.759925	0.846905	0.75185	0.917024	0.767423	0.679525	0.728828	0.601401	0.621499
	SINE	0.0436809	0.0464534	0.0399079	0.035598	0.0437171	0.0417188	0.0302807	0.0449675	0.0339798	0.03506
	DIRS	0.00245963	0.000805062	0.00968846	0.00145997	0.0130747	0.00213746	0.00105994	0.00155759	0.0017541	0.00243636
	PLE	0.0707002	0.067832	0.06726	0.0604559	0.114019	0.0722143	0.036731	0.0745512	0.0485408	0.0489168
Class II		29.1724	31.176	31.5314	32.2907	28.1189	28.9892	22.0286	29.9086	27.6447	26.3745
Subclass I
TIR		18.4594	19.5238	20.2031	20.5022	17.8298	18.2588	14.3328	19.0163	18.242	17.3568
	Tc1-Mariner	0.855927	0.809108	0.756138	0.776864	0.877851	0.881523	0.689536	0.911604	0.710448	0.712135
	hAT	3.02115	2.92162	3.09812	3.03655	2.88306	2.97335	2.52219	3.07504	2.95312	2.8215
	Mutator	6.48206	6.40401	6.55717	6.80081	6.39988	6.61065	4.74142	6.25332	5.74249	5.58817
	P	0.00555888	0.0083143	0.00623346	0.00928369	0.00707056	0.00516252	0.00493809	0.0121463	0.00454646	0.00556125
	PIF-Harbinger	1.93023	1.93326	1.9461	1.79443	1.80264	1.87614	1.72873	1.98025	1.72356	1.70501
	CACTA	6.16449	7.44748	7.83931	8.08423	5.85926	5.91198	4.64598	6.78393	7.1079	6.52445
Subclass II
	Helitron	10.5807	11.5204	11.1382	11.6044	10.1034	10.5508	7.517	10.7612	9.22243	8.83174
Unknown		2.49953	2.34931	2.08281	2.30331	2.46628	2.40874	1.80865	2.45479	1.75926	1.86721
Total		52.7672	56.0641	57.7733	60.068	51.8329	52.56	58.7792	55.3381	57.5457	55.5886

## Sheet: Table S3
Supplementary Table S3. Summary of the percentage of TEs in subgenomes of cultivated strawberry
Subgenome		C. virdis	C. vesca	C. iinumae	C. nipponica
Class I		30.6869	19.3705	29.4308	30.2389
LTR		30.0385	18.5571	28.707	29.5999
	Copyia	6.896	5.573	6.9679	6.94516
	Gypsy	21.8894	11.8928	20.5449	21.4049
nonLTR		0.6484	0.813381	0.723823	0.638932
	LINE	0.562783	0.715898	0.639288	0.561103
	SINE	0.03044	0.0406895	0.0358784	0.0327344
	DIRS	0.00471768	0.00204973	0.00172053	0.00147408
	PLE	0.0504598	0.0547436	0.0469367	0.0436213
Class II		25.0554	28.8292	25.7425	25.5275
Subclass I
TIR		16.5187	18.8588	17.0703	16.8951
	Tc1-Mariner	0.621465	0.80698	0.766737	0.64264
	hAT	2.62674	3.13125	2.75303	2.75606
	Mutator	5.28484	6.31213	5.35138	5.375
	P	0.00672851	0.00563043	0.00398494	0.00604545
	PIF-Harbinger	1.59747	1.86551	1.71668	1.62856
	CACTA	6.3815	6.73726	6.47849	6.48675
Subclass II		8.41436	9.82054	8.54622	8.50432
	Helitron	8.41436	9.82054	8.54622	8.50432
Unknown		1.79902	2.27893	1.77577	1.82021
Total		57.5413	50.4786	56.9491	57.5866

## Sheet: Table S4
Supplementary Table S4. Half-life rate of LTR-RT in Fragaria species
Taxa	Half count	Half-life rate
F. mandschurica	66.1012	2.46581
F. nubicola	85.4855	2.59907
F. daltoniana	37.3	3.54523
F. nilgerrensis	53.233	3.74182
F. viridis	39.794	2.9101
F. vesca	57.6063	2.68418
F. iinumae	105.323	2.96321
F. pentaphylla	102.827	2.36492
F. chiloensis	204.791	2.89907
F. x ananassa	171.264	3.1452

## Sheet: Table S5
Supplementary Table S5. The count of different LTR-RT families in the genomes of Fragaria species
Superfamily	Clade	F. mandschurica	F. nubicola	F. daltoniana	F. nilgerrensis	F. viridis	F. vesca	F. iinumae	F. pentaphylla	F. chiloensis	F. x ananassa
Copia		860	1203	621	687	413	680	791	1332	2103	1622
	Ale	164	182	114	114	142	158	269	200	853	614
	Alesia	0	0	1	2	1	0	0	0	3	2
	Angela	0	0	0	0	1	0	0	2	0	0
	Bianca	398	558	238	349	92	277	183	641	228	307
	Ikeros	37	42	20	18	26	25	33	48	200	101
	Ivana	56	52	28	47	37	44	52	56	178	124
	Osser	0	1	1	0	1	0	0	2	0	0
	SIRE	29	38	13	16	27	25	9	55	162	92
	TAR	10	9	6	5	7	6	3	5	13	17
	Tork	67	84	31	70	46	34	194	132	235	166
	unknown	99	237	169	66	33	111	48	191	231	199
Gypsy		469	560	155	501	303	413	1054	609	2425	1700
	Athila	98	92	64	117	47	86	162	112	706	311
	Ogre	37	93	16	35	46	18	272	93	429	325
	Retand	31	88	7	57	17	23	192	107	323	387
	CRM	62	82	18	51	60	44	19	114	228	195
	Galadriel	16	26	12	77	20	21	45	33	61	54
	Reina	34	37	22	21	36	25	24	26	119	82
	Tekay	187	119	9	140	62	192	173	88	318	228
	unknown	4	23	7	3	15	4	167	36	241	118
Total		1329	1763	776	1188	716	1093	1845	1941	4528	3322

## Sheet: Table S6
Supplementary Table S6. Details of the ten strawberry genomes used in this study
Taxa	Reference Genomes	Origin	Ploidy	Size (Mb)
Fragaria daltoniana	YNG v1.0	Yunnan & Shenyang, China	2n = 2x = 14	289.06
Fragaria iinumae	v1.0	Japan	2n = 2x = 14	240.59
Fragaria mandshurica	YNG v1.0	Yunnan & Shenyang, China	2n = 2x = 14	239.86
Fragaria nilgerrensis	YNG v1.0	Yunnan & Shenyang, China	2n = 2x = 14	273.4
Fragaria nubicola	SCBG v1.0	Tibet, China	2n = 2x = 14	247.59
Fragaria vesca	v4.0	USA	2n = 2x = 14	220.36
Fragaria viridis	YNG v1.0	Yunnan & Shenyang, China	2n = 2x = 14	223.12
Fragaria pentaphylla	YNG v1.0	Yunnan & Shenyang, China	2n = 4x = 28	279.13
Fragaria chiloensis	GP33 v1.0	Oregon, USA	2n = 8x = 56	798.09
Fragaria x ananassa	Camarosa v1.0	USA	2n = 8x = 56	805.49
